# Supplementary material
Source: publisher figshare collection journal article supplement (https://tandf.figshare.com/ndownloader/files/18035798)
Supplement: Supplementary file 1 [file 18035798]

**Supplement 1**

Investigated Specimens of Fruits of Angiosperms

*Aconitum napellus* L., N.V. Tsitsin Main Botanical Garden RAS, Moscow, Russia, M.S. Romanov, A.V.F.Ch. Bobrov, # 659, 19.07.2007, liquid-fixed material

*Adansonia digitata* L., Singapore Botanic Garden, Singapore, Singapore, M.S. Romanov, A.V.F.Ch. Bobrov, # 1599, 22.12.2009, liquid -fixed material

*Aegle marmelos*  (L.) Corrêa,Royal Botanic Gardens, Peredeniya, Sri Lanka, M.S. Romanov, A.V.F.Ch. Bobrov, # 1646, 26.12.2009, liquid -fixed material

*Amborella trichopoda* Baill., New Caledonia, W.G Ziarnik, s.n., 11.07.1982, dry material (MHA)

*Amoora rochituka* (Roxb.) Wight & Arn., Jardin Botanico National, la Habana, Cuba, M.S. Romanov, A.V.F.Ch. Bobrov, # 297, 10.01.2006, liquid -fixed material

*Anaxagorea javanica* Blume,Singapore Botanical Garden, Singapore, M.S. Romanov, A.V.F.Ch. Bobrov, # 1605, 22.12.2009, liquid -fixed material

*Aquilaria malaccensis* Lam., Guangdong, China, M.S. Romanov, A.V.F.Ch. Bobrov, # 2429, 08.07.2014, liquid-fixed material

*Arctium tomentosum* Mill*.*,Zvenigorod District, Moscow Region, Russia ,M.S. Romanov, s.n., 25.09.2011, dry material

*Aristea compressa*  Buchinger ex Baker,N.V. Tsitsin Main Botanical Garden RAS, Moscow, Russia, M.S. Romanov, A.V.F.Ch. Bobrov, # 1181, 16.09.2008, liquid-fixed material

*Aristolochia tagala* Cham., Singapore Botanic Garden, Singapore, Singapore, M.S. Romanov, A.V.F.Ch. Bobrov, # 1621, 23-12-2009, liquid-fixed material

*Bombax costatum* Pellegr. & Vuillet, Carpological collection of Komarov Botanical Institute, Saint Petersburg, Russia s/n, dry material

*Bonnetia cubensis* (Britton) Howard, El Narancha, Orienthe, Cuba, M.S. Romanov, A.V.F.Ch. Bobrov, # 526, 14.03.2007, dry material

*Butia capitata* (Mart.) Becc.,Subtropical Botanical Garden of Kuban, Sochi, Russia, M.S. Romanov, A.V.F.Ch. Bobrov, # 215, 31.08.2005, liquid-fixed material

*Calamus nambariensis* Becc.,Xishuangbanna Tropical Botanical Garden CAS, Xishuangbanna, Yunnan, China, M.S. Romanov, A.V.F.Ch. Bobrov, # 732, 24.10.2007, liquid-fixed material

*Caltha pallustris* var. *himalaica* Tamura, Royal Botanic Gardens, Kew, UK, M.S. Romanov, A.V.F.Ch. Bobrov, #1430, 01.05.2009, liquid-fixed material

*Camellia japonica* L., N.V. Tsitsin Main Botanical Garden RAS, Moscow, Russia, M.S. Romanov, s.n., 09.10.2006, liquid-fixed material

*Camellia oleifera* Abel, Subtropical Botanical Garden of Kuban, Sochi, Russia, M.S. Romanov, A.V.F.Ch. Bobrov, # 1198, 2.10.2008, liquid-fixed material

*Carex nigra*  (L.) Reichard,Istra District, Moscow Region, Russia, M.S. Romanov, # 1860, 3.07.2011, liquid-fixed material

*Carex vulpina* L., Istra District, Moscow Region, Russia, M.S. Romanov, # 1847, 25.06.2011, liquid-fixed material

*Carpenteria californica* Torr., Botanische Garten Köln, Köln, Germany, M.S. Romanov, # 1165, 03.09.2008, liquid-fixed material

*Cassytha* sp.,Jardin Botanico National, la Habana, Cuba, M.S. Romanov, A.V.F.Ch. Bobrov, # 281, 10.01.2006, liquid-fixed material

*Centaurea jacea* L., Zvenigorod District, Moscow Region, Russia, M.S. Romanov, s.n., 25.09.2011, dry material;

*Centaurea scabiosa* L., Zvenigorod District, Moscow Region, Russia, M.S. Romanov, s.n., 25.09.2011, dry material

*Cercidiphillum japonicum* var. *sinense* Rehder & E.H.Wilson, N.V. Tsitsin Main Botanical Garden RAS, Moscow, Russia M.S. Romanov, A.V.F.Ch. Bobrov, # 416, 09.10.2006, liquid-fixed material

*Cercidiphyllum japonicum* Siebold & Zucc. ex J.J.Hoffm. & J.H.Schult. bis, N.V. Tsitsin Main Botanical Garden RAS, Moscow, Russia, M.S. Romanov, A.V.F.Ch. Bobrov, # 417, 09.10.2006, liquid-fixed material

*Corylus avellana* L.,N.V. Tsitsin Main Botanical Garden RAS, Moscow, Russia, M.S. Romanov, # 1849, 6.08.09, liquid-fixed material

*Couroupita* *guianensis* Aubl.,Jardin Botanico National, la Habana, Cuba M.S. Romanov, A.V.F.Ch. Bobrov, # 568, 26.03.2007, liquid-fixed material

*Decaisnea insignis* (Griff.) Hook.f. & Thomson,N.V. Tsitsin Main Botanical Garden RAS, Moscow, Russia, M.S. Romanov, A.V.F.Ch. Bobrov, # 3063, 03.10.2017, liquid -fixed material

*Degeneria vitiensis* L.W.Bailey & A.C.Sm., Fiji, A.C. Smith, # 5555, 4-7.08.1947, dry material (MHA)

*Dictamnus albus* L., Central Siberian Botanical Garden, Novosibirsk, Russia, M.S. Romanov, A.V.F.Ch. Bobrov, # 348, 17.07.2006, liquid -fixed material

*Distylium* *racemosum* Siebold & Zucc.,Subtropical Botanical Garden of Kuban, Sochi, Russia, M.S. Romanov, A.V.F.Ch. Bobrov, # 230, 31.08.2005, liquid -fixed material

*Erythronium sibiricum* (Fisch. & C.A.Mey.) Krylov, Botanical Garden of M.V. Lomonosov Moscow State Univercity, Moscow, Russia, M.S. Romanov, A.V.F.Ch. Bobrov, # 594, 19.05.2007, liquid-fixed material

*Eugeissona* *utilis* Becc.,Mile 10, Muara Road, Brunei, J. Dransfield, # JD797, 20.4.68, liquid-fixed material

*Fagus orientalis* Lipsky, Subtropical Botanical Garden of Kuban, Sochi, Russia, M.S. Romanov, A.V.F.Ch. Bobrov, # 211, 25.08.2005, liquid-fixed material

*Ficus carica* L., Subtropical Botanical Garden of Kuban, Sochi, Russia M.S. Romanov, A.V.F.Ch. Bobrov, s.n., 21.09.2006, liquid-fixed material

*Fissistigma uonicum* (Dunn) Merr. Hei Shiding Natural Reserve, Fengkai County, Guangdong, China, M.S. Romanov, A.V.F.Ch. Bobrov, # 2318, 14.08.2013, liquid-fixed material

*Forsythia* *ovata* Nakai, Subtropical Botanical Garden of Kuban, Sochi, Russia, M.S. Romanov, A.V.F.Ch. Bobrov, # 1091, 29.07.2008, liquid-fixed material

*Hakea* *cuculata* R. Br., N.V. Tsitsin Main Botanical Garden RAS, Moscow, Russia, M.S. Romanov, A.V.F.Ch. Bobrov, #3064, 03.10.2017, liquid-fixed material

*Hamamelis vernalis* Sarg., N.V. Tsitsin Main Botanical Garden RAS, Moscow, Russia, M.S. Romanov, # 1440, 28.08.2009, liquid-fixed material

*Hennecartia omphalandra* Poiss., Caldas, prov. Minas Gerais, Brasil, A.F. Regnel, # III 1721, 22.08.1874, dry material (LE)

*Hernandia nymphaefolia* (J.Presl) Kubitzki,National Tropical Botanical Garden, Lihue, Hawaii, USA, M.S. Romanov, A.V.F.Ch. Bobrov, # 1314, 26.11.2008, liquid-fixed material

*Horsfieldia iryaghedhi* (Gaertn.) Warb.,Royal Botanic Gardens, Peredeniya, Sri Lanka, M.S. Romanov, A.V.F.Ch. Bobrov, # 1633, 27.12.2009, liquid-fixed material

*Hortonia ovaliifolia* Wight, Sri Lanka, L. Bernardi, #15913, 11.12.1975, dry material (LE)

*Hymenanthera crassifolia* Hook. F., Subtropical Botanical Garden of Kuban, Sochi, Russia, M.S. Romanov, A.V.F.Ch. Bobrov, s.n., 2.10.2008, liquid-fixed material

*Ilex rotunda* Thunb*.,* Guangdong, China, M.S. Romanov, A.V.F.Ch. Bobrov, # 2467, 09.07.2014, liquid-fixed material

*Kadsura coccinea* (Lem.) A.C.Sm., Hei Shiding Natural Reserve, Fengkai County, Guangdong, China, M.S. Romanov, A.V.F.Ch. Bobrov, # 2331, 14.08.2013, liquid-fixed material

*Liriodendron chinense*  (Hemsl.) Sarg.,Kunming Botanical Garden, China, M.S. Romanov, A.V.F.Ch. Bobrov, # 767, 29.10.2007, liquid-fixed material

*Litchi chinensis* Sonn., Hei Shiding Natural Reserve, Fengkai County, Guangdong, China, M.S. Romanov, A.V.F.Ch. Bobrov, # 2425, 08.07.2014, liquid-fixed material

*Magnolia campbelii* Hook.f. & Thomson, Royal Botanic Garden, Edinburgh, UK, M.S. Romanov, A.V.F.Ch. Bobrov, # 1510, 14.09.2009, liquid-fixed material

*Magnolia* *dodecapetala* (Lam.) Govaerts,Carpological collection of Komarov Botanical Institute, Saint Petersburg, Russia, s/n, dry material

*Magnolia* *kwangsiensis* Figlar & Noot., South China Botanical Garden CAS, Guangzhou, China, M.S. Romanov, A.V.F.Ch. Bobrov, # 1701, 04.09.2010, liquid -fixed material

*Magnolia* *oblongifolia* (León) Palmarola, La Melba, Moa, Holguin, Cuba A. Alvarez, J. Bisse, J. Gutiérres, F. Meyer, # 42531, 01.05.1980, dry material (HAJB)

*Monodora myristica* (Gaertn.) Dunal, Royal Botanic Gardens, Peredeniya, Sri Lanka, M.S. Romanov, A.V.F.Ch. Bobrov, # 1634, 26.12.2009, liquid-fixed material

*Nelumbo lutea* (Willd.) Pers., Cache River National Wildlife Refuge, Arkansas, USA, M.S. Romanov, # 2564, 13.10.2014, liquid-fixed material

*Nepenthes gracilis* Korth., Kota Kinabalu National Park, Sabah, Malaysia, M.S. Romanov, A.V.F.Ch. Bobrov, # 1798, 21.12.2010, liquid -fixed material

*Nothofagus alpina* (Poepp. & Endl.) Oerst.,Royal Botanic Garden, Edinburgh, UK, M.S. Romanov, A.V.F.Ch. Bobrov, # 1463, 14.09.2009, liquid -fixed material

*Nypa fruticans* Wurmb, National Tropical Botanical Garden, Lihue, Hawaii, USA, M.S. Romanov, A.V.F.Ch. Bobrov, # 1300, 25.11.2008, liquid-fixed material

*Ochna atropurpurea* DC.,N.V. Tsitsin Main Botanical Garden RAS, Moscow, Russia, M.S. Romanov, A.V.F.Ch. Bobrov, # 987, 15.05.2008, liquid-fixed material

*Olea europaea* subsp. *cuspidata* (Wall. & G.Don) Cif.,Arenal, Malorca, M.S. Romanov, # 1897, 16.09.2011, liquid-fixed material

*Pandanus utilis* Bory, The Kampong, National Tropical Botanical Garden, Miami, Florida, USA, M.S. Romanov, A.V.F.Ch. Bobrov, #1380, 04.12.2008, liquid-fixed material

*Pithecellobium* *dulce* (Roxb.) Benth.,Montgomery Botanical Center, Coral Gables, Florida, USA, M.S. Romanov, A.V.F.Ch. Bobrov, # 855, 07.03.2008, liquid-fixed material

*Polyceratocarpus parviflorus* (Baker f.) Ghesq.,Spirit collections (# 7118/000), Royal Botanic Gardens, Kew, UK, R.W.J. Keay, # 37943, 15.08.1960, liquid -fixed material

*Polygonum*  *lapathifolium* L.,Zvenigorod District, Moscow Region, Russia, M.S. Romanov, s.n., 25.09.2011, dry material

*Populus maximowiczii* Henry,Royal Botanic Gardens, Kew, UK, M.S. Romanov, A.V.F.Ch. Bobrov, # 1407, 26.04.2009, liquid-fixed material

*Pseudophoenix sargentii* H.Wendl. ex Sarg.,Jardin Botanico National, la Habana, Cuba, M.S. Romanov, A.V.F.Ch. Bobrov, # 293, 11.01.2006, Liquid-fixed material

*Rhododendron luteum* Sweet, Caucasian Biosphere Reserve, Sochi, Russia, M.S. Romanov, A.V.F.Ch. Bobrov, # 239, 30.08.2005, liquid-fixed material

*Rhododendron ponticum* L., Caucasian Biosphere Reserve, Sochi, Russia, M.S. Romanov, A.V.F.Ch. Bobrov, # 1108, 31.07.2008, liquid-fixed material

*Rosa* *maximowicziana* Regel, N.V. Tsitsin Main Botanical Garden RAS, Moscow, Russia, M.S. Romanov, s.n., 09.10.2006, dry material

*Rosa rugosa* Thunb.N.V. Tsitsin Main Botanical Garden RAS, Moscow, Russia, M.S. Romanov, s.n., 09.10.2006, dry material

*Rumex confertus* Willd., Zvenigorod District, Moscow Region, Russia, M.S. Romanov, s.n., 25.09.2011, dry material

*Rumex* *obtusifolius* L.,Zvenigorod District, Moscow Region, Russia, M.S. Romanov, s.n., 25.09.2011, dry material

*Saruma henryi* Oliv., N.V. Tsitsin Main Botanical Garden RAS, Moscow, Russia, M.S. Romanov, A.V.F.Ch. Bobrov, #1430, 21.06.2009, liquid-fixed material

*Satranala decussilvae* Beentje & J.Dransf.,Mananara Biosphere Reserve, Madagascar (RBG Kew Palm group collection, Richmond, UK), OUEM 15, July–August 1994, s.n., liquid-fixed material

*Schisandra chinensis* (Turcz.) Baill.,Sakhalin Botanical Garden FEB RAS, Yuzhno-Sakhalinsk, Russia, M.S. Romanov, A.V.F.Ch. Bobrov, # 412, 22.09.2006, liquid-fixed material

*Schoenoplectus lacustris* (L.) Palla, N.V. Tsitsin Main Botanical Garden RAS, Moscow, Russia, M.S. Romanov, s.n., 23.09.2011,dry material

*Serenoa repens* (W.Bartram) Small,Montgomery Botanical Center, Coral Gables, Florida, USA, M.S. Romanov, A.V.F.Ch. Bobrov, # 834, 06.03.2008, liquid-fixed material

*Strelitzia reginae* Banks, N.V. Tsitsin Main Botanical Garden RAS, Moscow, Russia, M.S. Romanov, A.V.F.Ch. Bobrov, # 985, 15.05.2008, liquid-fixed material

*Strychnos spinosa* Lam. Carpological collection of Komarov Botanical Institute, Saint Petersburg, Russia s/n, dry material

*Tambourissa tau* Lorence, National Tropical Botanical Garden, Lihue, Hawaii, USA, M.S. Romanov, A.V.F.Ch. Bobrov, # 1317, 26.11.08, liquid-fixed material

*Theobroma cacao* L., N.V. Tsitsin Main Botanical Garden RAS, Moscow, Russia, M.S. Romanov, A.V.F.Ch. Bobrov, # 1202, 18.10.2008, liquid-fixed material

*Umbellularia californica* (Hook. & Arn.) Nutt., Subtropical Botanical Garden of Kuban, Sochi, Russia, M.S. Romanov, A.V.F.Ch. Bobrov, s.n., 02.10.2008, liquid-fixed material

*Xanthorrhoea australis* R.Br., Wilson Promontory NP, Victoria, Australia, M.S. Romanov, A.V.F.Ch. Bobrov, # 2219, 27.11.2012, liquid-fixed material
